# Supplementary material for: Identification of a PH domain-containing protein which is localized to crystalloid bodies of Plasmodium ookinetes
Source: PubMed Central journal article supplement (PMC6291999; doi:10.1186/s12936-018-2617-6), 2018-12-13
Supplement: 12936_2018_2617_MOESM1_ESM.pdf [file 12936_2018_2617_MOESM1_ESM.pdf]

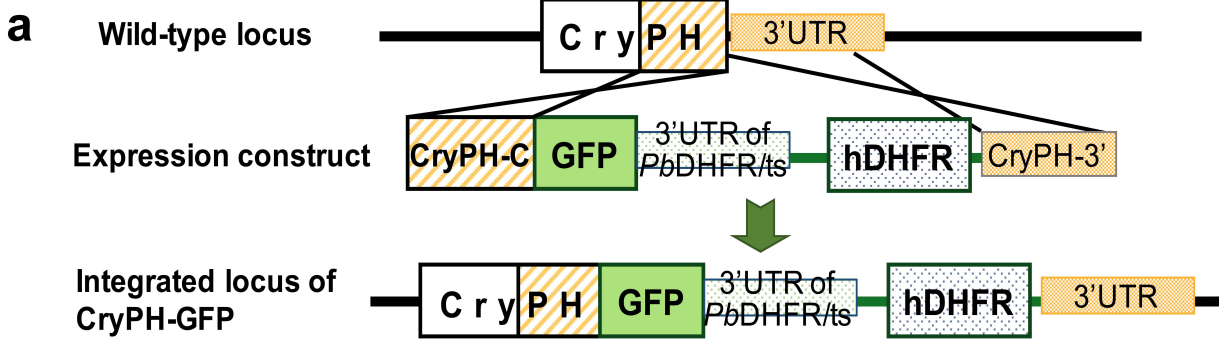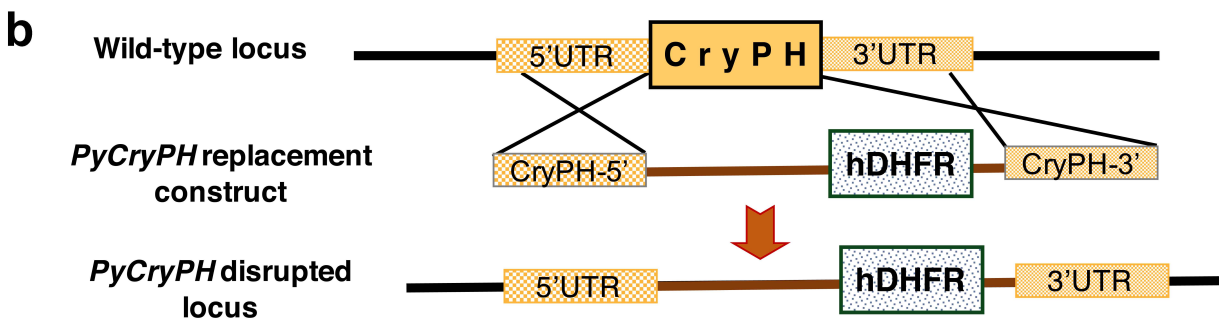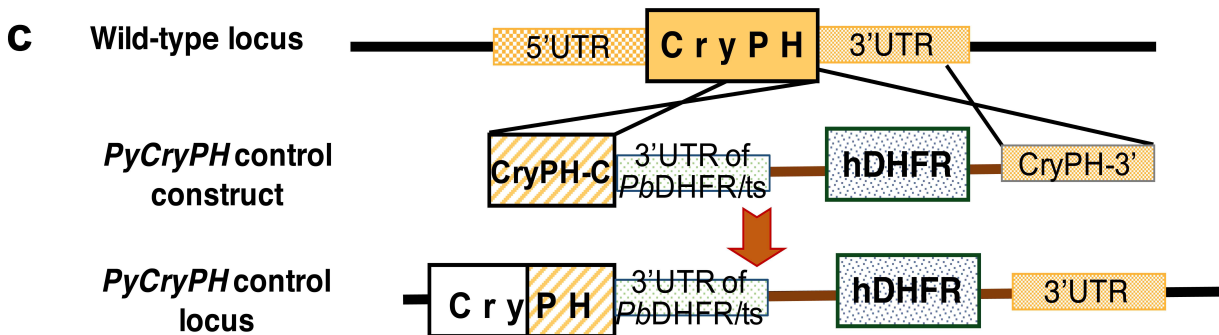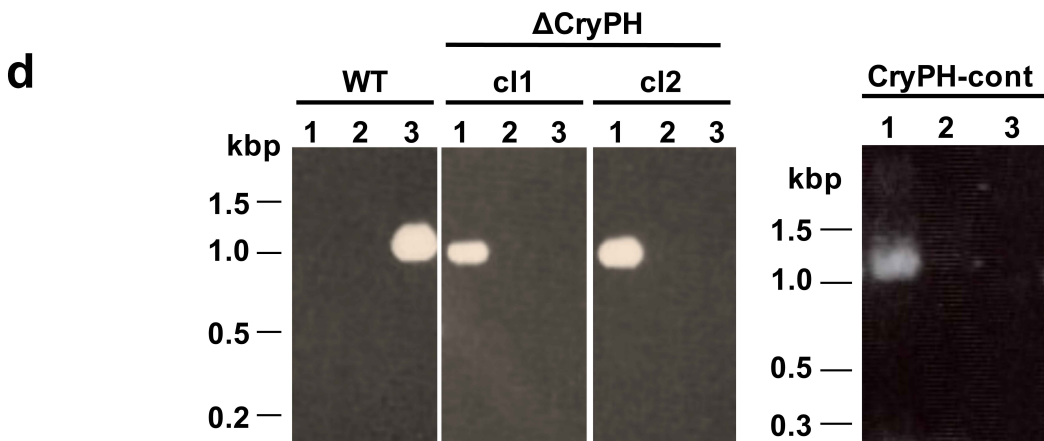

10 20 30 40 50 60 70 80 90 100

*Toxoplasma* MLLITFPTPDSRTPTQVCFLVPHCPAKNTAS-GFKLRLSLGQETMKVSAATASASCI~~AVLALVACRSEASPAFL~~--GSRGLGSRFEPQPTVEKEVEDAE~~EE~~

*Theileria* -----MKIFDHTFLFYVVLVYCLPNFICYT--HCL--NTIQTNTKLDHTLAIK~~D~~---KDP

*Babesia* -----MYLVTLITCVLWN-----PLHTNSKSVTDIEN~~N~~-----

*Plasmodium* -----MKVFVSI~~SFVCLIAFCRGRHKNFSRRNNYLQYLR~~SQTFMQEKPLTNFNGNYSE--DITEFDIHEDDEYNNL~~KN~~---DDT

*Cryptosporidium* -----MKMRIFFL~~FNLLSVAGLSQYAHGRLTR~~STSDFGLLPEQFLPGTITTLIQTARKIIGANVEPVSVIGEGKSQIS~~SQK~~--DSEKL

110 120 130 140 150 160 170 180 190 200

*Toxoplasma* LKTAEDDAALEEKNLESISYRDSLSRSEQRDESAAKGMINVDAEAPGCSVETTGDMDVATDPTDVLTTVPMSISISKRHLSVNYKGRELK~~P~~-----

*Theileria* LEEAEISEAYNIHSFEDIKKNLELLDGTGSKND-----IVFSHKLSGCDL~~LRD~~DIIEVAVDPIDILK~~TQEFICGVTPNELRL~~YFKDRNNKSSNTLKKGK

*Babesia* ---LID--TYRVNSLSD~~ELRNSDFLDS~~GEFRIR-----PLTLHKTTCNAQMRGDL~~EAAIETLDM~~MRTQTFLAELNSNSFTLSYKGNK~~DKL~~-----

*Plasmodium* KDTSDNDKMKENNKLEFKNL~~DELNTIEV~~NPDS-----INIMSGGK~~EC~~SVNEK~~GE~~LDV~~SINSQD~~IFNLIKY~~MEITSN~~--SIIIKDIKNS~~N~~-----

*Cryptosporidium* YSEAVSSAVSVYQKAMNDATNNK~~LKQR~~DVITSMP-----VVDSPKDPVCSVMISGELALALDPRNIFD~~VLLG~~VKITKDDLLFMTDLKN~~PES~~-----

210 220 230 240 250 260 270 280 290 300

*Toxoplasma* -VMKIPLLEIKTPINTLARSRRCFRLFHRTKPLVFCADDTAARDEWIANIYKAVFCINSGNLLTPVQQKAKRE--KGESVPLPSKSTKVQRWIK~~E~~IARQE

*Theileria* LFSRFSLN~~AVT~~PLETEIKSSRECFRLFYKSEPLVFCGKDAKARDLWMTSILKAKFCHYAH~~TN~~LNPAHKPETG---TLPQSLPKFSTKAERLKSRLLDKI

*Babesia* -FGKFYLPKIHTPLETIVSSRTCWRLKY~~NENPLILCAKNT~~NQRDAWMSAIIKAIYCNAA~~AG~~KSIGND~~NAAKDA~~---TNKNELDK~~FELPKHSIV~~DKIKHKV

*Plasmodium* VVKELSYDHIKLP~~IIETI~~EETRE~~CWSIKFN~~EKIIIFCEKNKQNRDNWVKDILKALFCYNTN~~NLTIEN~~NQKVYK---QKSDIPKHSTVNERIQNLKETLT

*Cryptosporidium* LVRSFSLNKIEVPLESVQNSR~~KCFR~~MYFDGSPVVMCAKSD~~EERNEM~~MNKLTEAIFCKNSGITFSKNTGTIENTGLSDSSLGV~~PAL~~TTKDLRWIEQIAKKQ

310 320 330 340 350 360 370 380

*Toxoplasma* AEALKEVQEGEM--MHRKKNVVEEVEIVGGSAGAPPKVTVNGDELAFSHAGQREQLMNANNQEF-----

*Theileria* NDDVELP-----LHDN~~KITNVDI~~KNILTG---EPQIFLNGDEVIQNDTKTKTGQTS-----

*Babesia* ATVHENIP-----THDSGLTEIDIKNLLSG---SPLITVDGEEFPQTDHLTKNVDKNLEGT~~KPSEIGIERAIK~~PHGVM

*Plasmodium* NDKN~~NFDKQ~~-----KSTKHNNNIVISNLKNS---NPNI~~SLK~~-----

*Cryptosporidium* IQMAGNVQSNV~~VNWLKSKGNQ~~HVVVKDSLGFN---PQITVNGEKVV-----

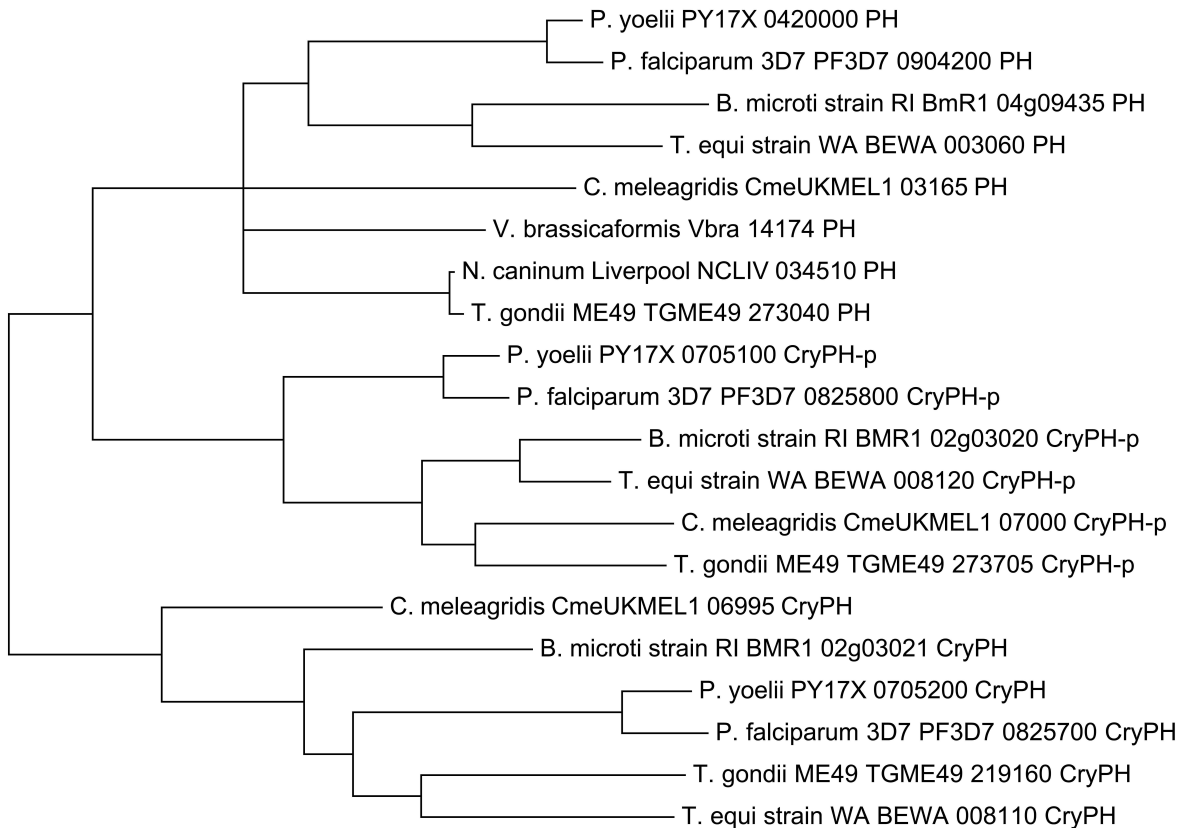

0.50
